# Supplementary material for: Characterizing Spatial Structures of Field-Scale Snowpack using Unpiloted Aerial System (UAS) Lidar and SfM Photogrammetry
Source: Copernicus journal article supplement (doi:10.5194/egusphere-2024-1530), 2024-06-21
Supplement: Supplementary file 1 [file egusphere-2024-1530-supplement.pdf]

*Supplement of*

**Characterizing Spatial Structures of Field-Scale Snowpack using  
Unpiloted Aerial System (UAS) Lidar and SfM Photogrammetry**

**Eunsang Cho et al.**

*Correspondence to:* Eunsang Cho ([eunsang.cho@txstate.edu](mailto:eunsang.cho@txstate.edu))

The copyright of individual parts of the supplement might differ from the CC BY 4.0 License.

**Table S1.** Summary statistics of UAS Lidar and Structure-from-Motion (SfM) photogrammetry snow depth values with in-situ snow depths from Magnaprobe (MP) and field cameras from February 4<sup>th</sup> to March 7<sup>th</sup>. All values were calculated from snow depth pairs only.

| Statistic               | Measurement Type | Field | Forest |
|-------------------------|------------------|-------|--------|
| Mean (cm)               | MP               | 14.2  | 14.8   |
|                         | SfM at MP        | 15.6  | 41.9   |
|                         | Lidar at MP      | 14.8  | 7.7    |
|                         | Cameras          | 9.4   | 9.6    |
|                         | SfM at Cameras   | 12.5  | 43.0   |
|                         | Lidar at Cameras | 9.7   | 9.3    |
| Bias (cm)               | MP vs SfM        | -0.61 | -27.0  |
|                         | MP vs Lidar      | -1.43 | 7.01   |
|                         | Cameras vs SfM   | -3.15 | -33.5  |
|                         | Cameras vs Lidar | -0.34 | 0.36   |
| Standard Deviation (cm) | MP               | 5.14  | 4.28   |
|                         | SfM at MP        | 10.34 | 66.6   |
|                         | Lidar at MP      | 6.15  | 5.27   |
|                         | Cameras          | 7.34  | 6.36   |
|                         | SfM at Cameras   | 27.06 | 88.2   |
|                         | Lidar at Cameras | 8.10  | 7.64   |
| N                       | MP               | 107   | 68.0   |
|                         | SfM at MP        | 105   | 56.0   |
|                         | Lidar at MP      | 107   | 61.0   |
|                         | Cameras          | 16    | 16.0   |
|                         | SfM at Cameras   | 16    | 15.0   |
|                         | Lidar at Cameras | 16    | 16.0   |
| a                       | MP vs SfM        | -0.49 | 24.3   |
|                         | MP vs Lidar      | 1.10  | -3.87  |
|                         | Cameras vs SfM   | 3.88  | 33.6   |
|                         | Cameras vs Lidar | 0.99  | -1.27  |
| b                       | MP vs SfM        | 1.13  | 1.18   |
|                         | MP vs Lidar      | 0.97  | 0.79   |
|                         | Cameras vs SfM   | 0.06  | 0.98   |
|                         | Cameras vs Lidar | 0.93  | 1.09   |
| r <sup>2</sup>          | MP vs SfM        | 0.33  | 0.01   |
|                         | MP vs Lidar      | 0.65  | 0.41   |
|                         | Cameras vs SfM   | 0.06  | 0.01   |
|                         | Cameras vs Lidar | 0.71  | 0.80   |
| MAD (cm)                | MP vs SfM        | 4.97  | 32.0   |
|                         | MP vs Lidar      | 2.96  | 7.25   |
|                         | Cameras vs SfM   | 14.3  | 44.7   |
|                         | Cameras vs Lidar | 3.02  | 2.69   |
| RMSD (cm)               | MP vs SfM        | 8.60  | 71.1   |
|                         | MP vs Lidar      | 3.67  | 8.13   |
|                         | Cameras vs SfM   | 25.6  | 91.4   |
|                         | Cameras vs Lidar | 4.27  | 3.3    |
| P-Value                 | MP vs SfM        | 0.09  | 0      |
|                         | MP vs Lidar      | 0.09  | 0      |
|                         | Cameras vs SfM   | 0.64  | 0.16   |
|                         | Cameras vs Lidar | 0.76  | 0.68   |
